# Supplementary material for: Model Experimental Study of Carbon Fiber Heating Wire for Deicing and Snow Melting on a Bridge Deck
Source: Hindawi journal article supplement (doi:10.1155/2020/8861468), 2020-01-01
Supplement: f1 [file 8861468.f1.xlsx]

## Sheet: Sheet1
This table 1 is corresponding to Figure 6.(Temperature change of cold storage)							This table 2 is corresponding to Figure 9. (Temperature change curves of measuring points, No. 4, 5, and 6, under various working conditions of temperature rise test: (a) -2 °C; (b) - 4 °C; (c) - 8 °C)													This table 3 is corresponding to Figure 10. (Temperature change curves of measuring points, No. 7, 8, and 9, under various working conditions of temperature rise test: (a) -2 °C; (b) - 4 °C; (c) - 8 °C)													This table 4 is corresponding to Figure 11. (Temperature change curves of measuring points, No. 25, 26, and 27, under various working conditions of temperature rise test: (a) -2 °C; (b) - 4 °C; (c) - 8 °C)													This table 5 is corresponding to Figure 12. (Temperature change curves of measuring points, No. 4, 5, and 6, under various working conditions of ice melting test: (a) -2°C; (b) - 4°C; (c) - 8°C.
working condition（-2℃）		working condition（-4℃）		working condition（-8℃）			working condition (a) -2°C				working condition (b) - 4°C				working condition (c) - 8°C.					working condition (a) -2°C				working condition (b) - 4°C				working condition (c) - 8°C.					working condition (a) -2°C				working condition (b) - 4°C				working condition (c) - 8°C.					working condition (a) -2°C
Time	Temperature	Time	Temperature	Time	Temperature		Time	No. 4	No. 5	No. 6	Time	No. 4	No. 5	No. 6	Time	No. 4	No. 5	No. 6		Time	No. 7	No. 8	No. 9	Time	No. 7	No. 8	No. 9	Time	No. 7	No. 8	No. 9		Time	No. 25	No. 26	No. 27	Time	No. 25	No. 26	No. 27	Time	No. 25	No. 26	No. 27		Time	No. 4	No. 5	No. 6
2.62774	1.77941	2.62774	1.70136	2.83303	1.64706		0	0.75	1.075	1.625	0	2	0.9375	0.875	0	-0.9874	-1.812	-2.214		0	1.3125	0.78	0.25	0	1.6	1.1	0.5	0	-1.8	-3.9	-2.8		0	5.6875	5.6875	5.25	0	4.8451	4.724	5.124	0	5.25	6.5625	5.4375		0	-0.8125	-0.9375	-0.6875
6.48723	1.77941	6.48723	1.66403	6.03558	1.51471		1.61002	0.8125	0.875	1.875	1.65232	2.0194	0.94533	0.88375	1.64414	-0.81697	-1.62579	-2.01653		1.65053	1.37439	0.84779	0.36124	3.33326	1.63333	1.1447	0.5474	6.12509	-0.78749	-2.8292	-1.7114		1.65151	5.71984	5.69242	5.27461	6.66717	4.97088	4.86346	5.22318	6.66685	5.3125	6.58334	5.45833		5.21002	-0.7604	-0.88447	-0.60101
10.3467	1.77941	9.64872	1.6267	9.19708	1.38575		3.22004	0.875	1.0625	2.0625	3.30465	2.0388	0.95316	0.8925	3.28828	-0.64654	-1.43959	-1.81907		3.30106	1.43629	0.91558	0.47247	6.66653	1.66667	1.18939	0.59479	12.3128	-0.26308	-2.06655	-1.10971		3.30301	5.75217	5.69734	5.29922	13.3343	5.09665	5.00293	5.32235	13.3337	5.375	6.60417	5.47917		10.42	-0.7083	-0.83177	-0.51691
13.5082	1.74208	12.3586	1.53507	12.3586	1.25339		4.83006	1	1.1875	2.25	4.95697	2.05819	0.961	0.90125	4.93241	-0.47611	-1.25338	-1.6216		4.95159	1.49818	0.98337	0.58371	9.99979	1.7	1.23409	0.64219	18.5182	-0.02238	-1.8508	-0.9514		4.95452	5.78451	5.70227	5.32383	20.0015	5.22243	5.14239	5.42153	20.0005	5.43751	6.62501	5.5		15.6301	-0.65614	-0.78301	-0.46011
16.2181	1.64706	15.1095	1.40271	15.5611	1.08371		6.44009	1.25	1.375	2.5	6.60918	2.0857	1.00731	0.94106	6.57807	-0.32105	-1.04961	-1.42463		6.6006	1.59203	1.07275	0.67908	13.3331	1.73333	1.26453	0.67953	24.7288	0.01207	-1.82128	-0.95294		6.60613	5.81071	5.75532	5.35689	26.6685	5.35547	5.2656	5.5185	26.6674	5.50001	6.64585	5.52084		20.84	-0.59561	-0.71522	-0.40483
19.4206	1.55204	18.271	1.30769	18.7226	0.91403		8.05007	1.4375	1.5625	2.75	8.26138	2.11343	1.05465	0.98171	8.22379	-0.16664	-0.84502	-1.22768		8.24956	1.68685	1.1628	0.7739	16.6663	1.76666	1.29496	0.71686	30.9399	0.01216	-1.81767	-0.95418		8.25775	5.83674	5.8097	5.39019	33.3355	5.48851	5.3888	5.61548	33.3342	5.56251	6.66668	5.54167		26.0492	-0.49148	-0.54828	-0.35741
22.5821	1.42308	21.4325	1.12104	21.4325	0.69005		9.65897	1.5625	1.75	2.9375	9.91359	2.14115	1.10198	1.02235	9.86951	-0.01224	-0.64043	-1.03073		9.89853	1.78167	1.25284	0.86871	19.9996	1.8	1.32539	0.7542	37.1509	0.01226	-1.81407	-0.95543		9.90937	5.86277	5.86408	5.42349	40.0026	5.62155	5.51201	5.71244	40.0011	5.62501	6.68756	5.56251		31.2585	-0.38845	-0.38428	-0.30417
25.7436	1.29072	24.635	0.89706	24.1834	0.42873		11.2679	1.75	1.9375	3.125	11.5654	2.18796	1.14782	1.07455	11.5182	0.10552	-0.43651	-0.82256		11.5483	1.86104	1.32958	0.9314	23.3329	1.83333	1.36762	0.78693	43.362	0.01232	-1.81238	-0.957		11.5609	5.89507	5.89437	5.45251	46.6697	5.75186	5.61215	5.78298	46.6679	5.68751	6.75006	5.60418		36.4678	-0.2889	-0.22962	-0.23278
28.4945	1.15837	27.7965	0.63575	26.8932	0.16403		12.8768	1.9375	2.125	3.3125	13.2171	2.23583	1.19358	1.1274	13.1672	0.22012	-0.23266	-0.61323		13.1981	1.93941	1.40544	0.99181	26.6661	1.86666	1.40985	0.81967	49.573	0.01235	-1.81235	-0.95887		13.2124	5.92774	5.92324	5.48128	53.3367	5.88217	5.71229	5.85353	53.3348	5.75001	6.81257	5.64585		41.6771	-0.18635	-0.08304	-0.15339
31.656	1.02941	31.4097	0.46606	30.0547	-0.05995		14.4857	2.0625	2.25	3.5	14.8688	2.2837	1.23933	1.18025	14.8162	0.33472	-0.02881	-0.4039		14.848	2.01778	1.4813	1.05223	29.9994	1.89999	1.45208	0.8524	55.7841	0.01238	-1.81232	-0.96073		14.8639	5.96041	5.95211	5.51005	60.0038	6.01248	5.81245	5.92407	60.0016	5.81252	6.87508	5.68751		46.8862	-0.07748	0.04639	-0.05726
34.8175	0.89706	35.0639	0.24208	32.8057	-0.32127		16.0945	2.1875	2.4375	3.6875	16.5212	2.29511	1.24469	1.202	16.4639	0.46535	0.03547	-0.26833		16.4983	2.08344	1.5385	1.11532	33.3326	1.93333	1.4518	0.89629	61.9951	0.01241	-1.81229	-0.96299		16.5155	5.98717	5.97204	5.57658	66.6708	6.14572	5.94911	5.99121	66.6683	5.89585	6.93758	5.72918		52.0936	0.08467	0.14705	0.17933
38.0201	0.72738	38.9234	0.01471	35.0639	-0.6233		17.7022	2.375	2.625	3.8125	18.1736	2.30337	1.24653	1.22104	18.1116	0.59798	0.07678	-0.14499		18.1488	2.1478	1.59379	1.1787	36.6659	1.96666	1.4515	0.94018	68.2062	0.01244	-1.81226	-0.9661		18.1671	6.01339	5.99117	5.64646	73.3379	6.27896	6.08578	6.05835	73.3349	5.97919	7.00009	5.77085		57.2983	0.32598	0.20461	0.6228
41.8796	0.59842	42.0849	-0.20928	37.7737	-0.88462		19.3099	2.5	2.8125	4	19.826	2.31163	1.24836	1.24007	19.7592	0.73061	0.11809	-0.02166		19.7992	2.21217	1.64909	1.24208	39.9992	1.99999	1.4512	0.98408	74.4172	0.01247	-1.81223	-0.9692		19.8187	6.03962	6.0103	5.71634	80.0049	6.4123	6.22247	6.12566	80.0015	6.06251	7.0626	5.81253		62.503	0.56618	0.35409	0.97975
45.0411	0.46606	45.2874	-0.47059	40.4836	-1.20362		20.9176	2.6875	2.9375	4.1875	21.4782	2.3379	1.27923	1.26338	21.406	0.87302	0.13188	0.02271		21.4504	2.25057	1.68772	1.26806	43.3326	2.0081	1.45816	1.03677	80.6283	0.0125	-1.81213	-0.97237		21.4701	6.0766	6.05026	5.77989	86.6679	6.67945	6.41446	6.31229	86.6683	6.12502	7.1251	5.87503		67.7078	0.80519	0.60279	1.24238
48.9006	0.33371	48.4489	-0.73529	43.6861	-1.52262		22.5252	2.875	3.125	4.375	23.1304	2.36628	1.31354	1.28721	23.0526	1.0171	0.14015	0.05026		23.1017	2.28538	1.72405	1.28871	46.666	2.0162	1.46513	1.08947	86.8394	0.01249	-1.81142	-0.9761		23.1215	6.1149	6.0928	5.84265	93.3309	6.9466	6.60645	6.49892	93.3352	6.18752	7.18761	5.93753		72.9148	0.98362	0.78372	1.4451
52.76	0.16403	51.6104	-0.99661	46.396	-1.78394		24.1334	3	3.25	4.625	24.7826	2.39467	1.34785	1.31103	24.6993	1.16119	0.14841	0.0778		24.7531	2.32019	1.76037	1.30935	49.9994	2.0243	1.4721	1.14216	93.0504	0.01249	-1.8107	-0.97982		24.7729	6.1532	6.13533	5.90541	99.9939	7.21375	6.79845	6.68549	100.002	6.25003	7.25023	6.00004		78.1234	1.11437	0.91125	1.6002
55.9215	0.03507	54.813	-1.22059	49.1058	-2.08597		25.7469	3.125	3.4375	4.75	26.435	2.41355	1.34145	1.32194	26.3494	1.25497	0.15667	0.10535		26.4047	2.33102	1.77226	1.33	53.3328	2.04993	1.47513	1.16685	99.2615	0.01248	-1.80999	-0.98355		26.4244	6.18315	6.16498	5.97897	106.661	7.34968	6.93696	6.7945	106.668	6.35419	7.37523	6.1042		83.3321	1.24512	1.03877	1.75529
59.1241	-0.13462	58.6724	-1.52262	51.1588	-2.34729		27.3605	3.2125	3.5625	4.7475	28.0873	2.431	1.32883	1.33086	28.0003	1.33751	0.16494	0.12796		28.0564	2.33763	1.77986	1.35064	56.6661	2.07556	1.47817	1.19152	105.472	0.07632	-1.76194	-0.92117		28.076	6.21176	6.19256	6.05429	113.328	7.48549	7.07546	6.9035	113.335	6.45835	7.50023	6.20836		88.5407	1.37587	1.1663	1.91039
62.2856	-0.3586	62.9836	-1.78394	53.8686	-2.66629		28.974	3.2375	3.75	4.7625	29.7397	2.44845	1.3162	1.33978	29.6512	1.42006	0.1732	0.13829		29.7081	2.34423	1.78746	1.37129	59.9994	2.1012	1.4812	1.21618	111.683	0.14877	-1.70734	-0.84974		29.7276	6.24038	6.22014	6.1296	119.995	7.62129	7.21396	7.01256	120.001	6.56251	7.62526	6.31252		93.7501	1.47091	1.25814	2.00277
66.1451	-0.49095	66.802	-2.04864	56.6195	-2.98529		30.5876	3.3375	3.875	4.7825	31.392	2.46518	1.28285	1.33014	31.3028	1.48635	0.18147	0.14862		31.3596	2.36329	1.79603	1.38128	63.3329	2.09993	1.46587	1.22583	117.893	0.22122	-1.65273	-0.77831		31.379	6.27516	6.24888	6.17549	126.662	7.75164	7.32011	7.17158	126.668	6.62501	7.77108	6.39585		98.9597	1.55205	1.33606	2.07045
69.3066	-0.66063	70.4562	-2.30995	59.3294	-3.3043		32.2013	3.4385	3.375	4.7625	33.0444	2.48177	1.24558	1.31699	32.9545	1.5483	0.18874	0.15895		33.0112	2.38503	1.80482	1.38895	66.6663	2.09867	1.45054	1.23546	124.104	0.28908	-1.5914	-0.72266		33.0305	6.31116	6.27785	6.21536	133.329	7.88198	7.42625	7.3306	133.335	6.68751	7.91691	6.47918		104.169	1.63319	1.41398	2.13814
72.9608	-0.88462	74.3157	-2.53394	62.4909	-3.6233		33.8168	3.4485	3.375	4.8625	34.6967	2.49835	1.20831	1.30384	34.6063	1.61024	0.19333	0.16929		34.6627	2.40676	1.81361	1.39661	69.9997	2.0974	1.4352	1.24509	130.315	0.35457	-1.52658	-0.67514		34.6819	6.34717	6.30682	6.25523	139.996	8.01232	7.53239	7.48963	140.002	6.75001	8.06266	6.56251		109.379	1.71433	1.49189	2.20583
77.2719	-1.01697	78.1752	-2.76131	65.6934	-3.94231		35.4322	3.5585	3.4375	4.8875	36.3488	2.53132	1.21448	1.28883	36.2589	1.64074	0.19792	0.17962		36.3143	2.42537	1.818	1.40849	73.333	2.13116	1.44093	1.24287	136.525	0.42006	-1.46176	-0.62762		36.3335	6.37208	6.35498	6.24966	146.663	8.14822	7.66596	7.66452	146.668	6.81252	8.16683	6.62501		114.589	1.79017	1.53353	2.3053
82.0347	-1.20362	82.0347	-3.02262	69.5529	-4.26131		37.0477	3.5875	3.625	4.9125	38.0008	2.56796	1.23054	1.27339	37.9117	1.6614	0.20251	0.19076		37.9659	2.44317	1.82127	1.42147	76.6662	2.16493	1.44667	1.24063	142.736	0.48216	-1.40204	-0.57648		37.9852	6.39434	6.40771	6.23291	153.33	8.28413	7.79953	7.83941	153.335	6.87502	8.271	6.68751		119.799	1.86529	1.57022	2.40913
87.4544	-1.33597	85.8942	-3.24661	72.7144	-4.57692		38.6631	3.6125	3.6875	4.9375	39.6529	2.6046	1.2466	1.25796	39.5645	1.68206	0.2071	0.20454		39.6175	2.46098	1.82454	1.43446	79.9995	2.19869	1.4524	1.2384	148.947	0.53995	-1.34883	-0.52074		39.6369	6.4166	6.46044	6.21616	159.997	8.42004	7.93309	8.0143	160.002	6.93754	8.37541	6.75001		125.008	1.94042	1.60692	2.51296
91.7655	-1.4276	90.2053	-3.41629	76.3686	-4.8043		40.2783	3.6375	3.8125	5	41.3013	2.7132	1.29882	1.28605	41.2171	1.71793	0.21169	0.21831		41.2691	2.47678	1.83045	1.4533	83.3329	2.18384	1.4649	1.23034	155.158	0.59774	-1.29562	-0.46499		41.2884	6.44539	6.4856	6.20954	166.665	8.51387	8.0624	8.1802	166.668	7.06253	8.62527	6.83334		130.218	2.01458	1.64317	2.61469
96.0766	-1.55995	94.9681	-3.54864	80.187	-5.06561		41.892	3.6625	3.875	5.125	42.9488	2.84095	1.36074	1.32579	42.8695	1.75924	0.21629	0.23209		42.9207	2.49197	1.83716	1.47395	86.6663	2.16897	1.4774	1.22227	161.369	0.66125	-1.23813	-0.40733		42.94	6.47601	6.50294	6.20586	173.332	8.60769	8.1917	8.3461	173.334	7.18751	8.87514	6.91667		135.428	2.06671	1.66922	2.66675
100.388	-1.65498	98.8276	-3.6776	83.8412	-5.28959		43.5057	3.6875	4	5.25	44.5963	2.9687	1.42266	1.36553	44.5219	1.80055	0.22088	0.24586		44.5723	2.50717	1.84386	1.49459	89.9997	2.1541	1.4899	1.2142	167.579	0.74497	-1.16542	-0.34289		44.5915	6.50663	6.52028	6.20218	180	8.7015	8.321	8.512	180	7.3125	9.125	7		140.638	2.11883	1.69527	2.71882
104.699	-1.74661	102.687	-3.84729	88.604	-5.42195		45.1193	3.8125	4.0625	5.375	46.2428	3.10874	1.51588	1.45352	46.1744	1.84186	0.22547	0.25964		46.2238	2.53394	1.84829	1.50812	93.3331	2.14743	1.49033	1.22126	173.79	0.82868	-1.09271	-0.27844		46.2428	6.54599	6.55379	6.207										145.848	2.17096	1.72132	2.77088
109.01	-1.87896	107.45	-3.84729	92.9151	-5.59163		46.733	3.9375	4.125	5.5	47.8889	3.25278	1.61895	1.55659	47.8268	1.88317	0.23006	0.27341		47.8752	2.56475	1.85193	1.51912	96.6665	2.14077	1.49077	1.22833	180	0.9124	-1.02	-0.214		47.8941	6.58823	6.59263	6.21468										151.058	2.24575	1.77155	2.84454
113.773	-1.97059	111.309	-3.84729	96.7746	-5.81561		48.3465	4.0625	4.1875	5.625	49.5351	3.39682	1.72202	1.65966	49.4792	1.92448	0.23465	0.28719		49.5266	2.59557	1.85556	1.53012	100	2.1341	1.4912	1.2354						49.5454	6.63047	6.63148	6.22236										156.265	2.40945	1.91715	3.00318
118.536	-2.01131	115.62	-3.84729	100.634	-6.03959		49.9593	4.125	4.3125	5.6875	51.1834	3.51146	1.84004	1.73871	51.1317	1.96579	0.23924	0.30096		51.1782	2.60925	1.86351	1.53215	103.333	2.1312	1.4925	1.25644						51.197	6.65935	6.659	6.24761										161.473	2.57316	2.06275	3.16181
122.19	-2.04864	119.891	-3.84729	104.494	-6.26697		51.5721	4.25	4.4375	5.8125	52.8326	3.61454	1.96362	1.80887	52.7841	2.0071	0.24383	0.31474		52.8299	2.61606	1.87319	1.53053	106.667	2.1283	1.4938	1.27749						52.8486	6.68315	6.68221	6.27962										166.681	2.73686	2.20835	3.32045
126.049	-2.01131	123.545	-3.80995	107.655	-6.49095		53.1849	4.375	4.5625	5.875	54.4819	3.71762	2.0872	1.87903	54.4365	2.04841	0.24842	0.32851		54.4815	2.62286	1.88287	1.52891	110	2.1254	1.4951	1.29853						54.5003	6.70695	6.70542	6.31163										171.888	2.91672	2.37881	3.49644
130.812	-2.01131	127.404	-3.77262	111.966	-6.66063		54.7977	4.5	4.625	6	56.1325	3.79247	2.13934	1.92317	56.0885	2.10332	0.25339	0.34228		56.133	2.64786	1.89139	1.52323	113.334	2.13107	1.49707	1.31042						56.1517	6.74362	6.74988	6.34437										177.094	3.12496	2.59311	3.7029
134.672	-2.01131	131.264	-3.73529	116.277	-6.78959		56.4106	4.5625	4.6875	6.0625	57.7838	3.85439	2.15999	1.95621	57.7403	2.16526	0.25856	0.35606		57.7843	2.68119	1.89938	1.51566	116.667	2.13673	1.49903	1.32231						57.8029	6.78588	6.80358	6.37744										182.3	3.33321	2.8074	3.90937
140.091	-2.01131	135.575	-3.69796	121.04	-7.01697		58.0234	4.6875	4.8125	6.1875	59.435	3.91631	2.18064	1.98925	59.3921	2.2272	0.26372	0.36983		59.4357	2.71451	1.90737	1.5081	120.001	2.1424	1.501	1.3342						59.4542	6.82813	6.85729	6.4105										187.506	3.54145	3.0217	4.11583
144.402	-1.97059	139.886	-3.66063	124.694	-7.24095		59.6362	4.75	4.9375	6.25	61.0863	3.97824	2.27005	2.05566	61.0443	2.27611	0.26889	0.38791		61.0871	2.74725	1.91996	1.50398	123.334	2.15063	1.5054	1.32327						61.1056	6.86689	6.9054	6.44412										192.713	3.7191	3.22333	4.30704
148.057	-1.93326	144.197	-3.69796	129.457	-7.46493		61.249	4.875	5	6.375	62.7376	4.04016	2.39363	2.13818	62.6968	2.31742	0.27405	0.40857		62.7384	2.77968	1.93492	1.50167	126.667	2.15887	1.5098	1.31233						62.757	6.90391	6.95075	6.47801										197.922	3.86863	3.41327	4.48428
151.916	-1.89593	148.508	-3.73529	134.22	-7.59729		62.8618	5	5.0625	6.4375	64.3889	4.10208	2.51721	2.22069	64.3492	2.35873	0.27922	0.42923		64.3898	2.81212	1.94989	1.49936	130.001	2.16711	1.5142	1.3014						64.4084	6.94094	6.99609	6.5119										203.13	4.01815	3.60321	4.66152
155.776	-1.8043	152.819	-3.77262	139.64	-7.69231		64.4744	5.0625	5.1875	6.5625	66.0405	4.15101	2.61478	2.31646	66.0018	2.38752	0.28438	0.4499		66.0412	2.8443	1.96055	1.50575	133.334	2.21614	1.51727	1.34141						66.0599	6.97552	7.04238	6.54885										208.338	4.16768	3.79316	4.83876
159.635	-1.8043	158.239	-3.80995	145.552	-7.78394		66.0863	5.1875	5.25	6.6875	67.6925	4.19231	2.69729	2.41953	67.6547	2.40818	0.28955	0.47056		67.6926	2.87634	1.96871	1.51728	136.667	2.26517	1.52033	1.38143						67.7113	7.00875	7.08921	6.58753										213.547	4.28633	3.91505	4.95558
163.453	-1.76697	162.55	-3.84729	151.464	-7.87896		67.6983	5.3125	5.375	6.75	69.3444	4.23361	2.77981	2.5226	69.3075	2.42884	0.29471	0.49122		69.3439	2.90837	1.97687	1.52881	140	2.3142	1.5234	1.42144						69.3628	7.04198	7.13604	6.62621										218.756	4.39052	4.00471	5.04423
166.656	-1.8043			157.787	-7.87896		69.3103	5.375	5.4375	6.8125	70.9947	4.31217	2.87474	2.63824	70.9601	2.4615	0.29988	0.51188		70.9954	2.93464	1.99485	1.53515	143.333	2.34993	1.53307	1.44403						71.0143	7.0746	7.16348	6.65561										223.965	4.4947	4.09437	5.13288
169.818	-1.89593			163.7	-7.91629		70.9223	5.5	5.5	6.8375	72.6439	4.41524	2.97781	2.76182	72.6125	2.50281	0.30504	0.53254		72.647	2.9571	2.01926	1.53806	146.666	2.38566	1.54274	1.46661						72.6659	7.10684	7.17865	6.67913										229.174	4.59889	4.18403	5.22153
173.472	-1.99095			168.463	-7.91629		72.5355	5.625	5.5625	6.8375	74.2931	4.51832	3.08089	2.8854	74.2649	2.54412	0.31021	0.5532		74.2985	2.97956	2.04366	1.54096	150	2.4214	1.55241	1.4892						74.3174	7.13907	7.19381	6.70265										234.38	4.81395	4.24339	5.51128
177.331	-2.08597			172.076	-7.87896		74.1514	5.635	5.625	6.8388	75.9435	4.59788	3.1722	3.00898	75.9176	2.57397	0.3171	0.57386		75.9501	2.9941	2.06577	1.54408	153.333	2.44596	1.57628	1.49693						75.9689	7.17211	7.21852	6.73408										239.585	5.04989	4.29694	5.83832
182.094	-2.08597			176.839	-7.91629		75.7673	5.645	5.625	6.85	77.5948	4.6598	3.25472	3.13256	77.5704	2.59463	0.32536	0.59452		77.6018	3.00279	2.08618	1.54735	156.666	2.47053	1.60014	1.50467						77.6203	7.2057	7.25	6.7711										244.792	5.22298	4.38149	6.07912
182.546	-2.08597			179.589	-7.91629		77.3833	5.655	5.625	6.8575	79.2461	4.72173	3.33723	3.25614	79.2232	2.61529	0.33363	0.61518		79.2534	3.01147	2.10659	1.55062	160	2.4951	1.62402	1.5124						79.2718	7.23929	7.28148	6.80813										250	5.39063	4.46875	6.3125
182.094	-2.04864			180.698	-7.91629		78.9992	5.675	5.625	6.8625	80.8979	4.76122	3.38131	3.33208	80.876	2.63595	0.34189	0.64669		80.9049	3.03513	2.12046	1.55494	163.333	2.50477	1.66648	1.54007						80.9233	7.27225	7.31382	6.85227
							80.6151	5.685	5.625	6.825	82.5502	4.78188	3.39294	3.36807	82.5289	2.65661	0.35016	0.688		82.5562	3.07112	2.12895	1.56012	166.667	2.51443	1.70894	1.56774						82.5748	7.30472	7.34685	6.90203
							82.231	5.695	5.625	6.8125	84.2025	4.80253	3.40457	3.40407	84.1817	2.67727	0.35842	0.72931		84.2075	3.10712	2.13744	1.56531	170	2.5241	1.75141	1.59541						84.2263	7.33719	7.37988	6.9518
							83.847	5.645	5.625	6.8375	85.8548	4.82633	3.42468	3.42671	85.8345	2.69793	0.36668	0.78092		85.859	3.12189	2.12572	1.56787	173.333	2.5494	1.79561	1.60407						85.8778	7.3699	7.41349	6.98171
							85.4629	5.645	5.625	6.8885	87.507	4.85306	3.45274	3.43689	87.4873	2.71859	0.37495	0.84287		87.5107	3.11707	2.09547	1.568	176.667	2.5747	1.8398	1.61274						87.5293	7.40283	7.44761	6.994
							87.0788	5.645	5.625	6.91625	89.1592	4.8798	3.48079	3.44707	89.1401	2.73925	0.44292	0.90481		89.1624	3.11225	2.06522	1.56813	180	2.6	1.884	1.6214						89.1808	7.43577	7.48173	7.00629
							88.6947	5.645	5.625	6.92875	90.8115	4.89472	3.49819	3.46023	90.7924	2.78189	0.51127	0.9838		90.814	3.11647	2.05783	1.56459										90.8324	7.46409	7.51492	7.03069
							90.3105	5.645	5.625	6.9575	92.464	4.89741	3.5045	3.47647	92.444	2.84837	0.57962	1.08181		92.4656	3.13002	2.07388	1.55725										92.484	7.48787	7.54719	7.06706
							91.9263	5.645	5.625	6.96125	94.1164	4.9001	3.51082	3.49271	94.0956	2.91484	0.64797	1.17983		94.1173	3.14356	2.08993	1.54992										94.1357	7.51165	7.57946	7.10343
							93.5422	5.645	5.4375	6.97875	95.7687	4.91668	3.52161	3.51079	95.746	3.0026	0.74083	1.27344		95.7689	3.15681	2.10264	1.54271										95.7872	7.54315	7.61104	7.13846
							95.158	5.6875	5.5	6.98375	97.4208	4.94921	3.53757	3.53098	97.3951	3.11611	0.8634	1.36148		97.4206	3.16973	2.11153	1.53564										97.4385	7.58311	7.64186	7.17202
							96.773	5.75	5.5625	7	99.0729	4.98174	3.55353	3.55117	99.0441	3.22962	0.98596	1.44953		99.0722	3.18264	2.12041	1.52857										99.0899	7.62307	7.67268	7.20558
							98.3872	5.8125	5.6875	7.0625	100.724	5.04524	3.60764	3.60772	100.694	3.33016	1.09799	1.55515		100.724	3.19207	2.13018	1.52279										100.741	7.65993	7.70581	7.24304
							100.001	5.9375	5.6875	7.0625	102.373	5.14831	3.71071	3.71079	102.345	3.41279	1.19541	1.68572		102.376	3.19703	2.14108	1.51866										102.393	7.69296	7.74182	7.28532
							101.616	5.9375	5.75	7.125	104.022	5.25139	3.81378	3.81386	103.996	3.49543	1.29282	1.8163		104.027	3.20198	2.15198	1.51453										104.044	7.72599	7.77782	7.3276
							103.23	6.0625	5.8125	7.1875	105.671	5.35446	3.91686	3.91693	105.647	3.56841	1.39325	1.9284		105.679	3.21162	2.16248	1.51346										105.696	7.75901	7.81272	7.36599
							104.845	6.125	5.9375	7.3125	107.321	5.45754	4.01993	4.02	107.299	3.62639	1.49842	2.01023		107.33	3.22797	2.17239	1.51676										107.347	7.79204	7.84612	7.39902
							106.461	6.25	5.9375	7.375	108.97	5.56062	4.123	4.12307	108.951	3.68438	1.60359	2.09205		108.982	3.24432	2.1823	1.52006										108.999	7.82507	7.87951	7.43205
							108.076	6.3125	6.0625	7.375	110.62	5.6399	4.20294	4.18922	110.603	3.73221	1.68788	2.16457		110.634	3.26033	2.19514	1.52361										110.65	7.8581	7.9181	7.46665
							109.692	6.4375	6.125	7.385	112.272	5.67958	4.24421	4.19382	112.256	3.76239	1.73457	2.21985		112.285	3.27579	2.21268	1.52754										112.302	7.89113	7.96473	7.50368
							111.308	6.375	6.1875	7.388	113.924	5.71926	4.28547	4.19841	113.908	3.79257	1.78126	2.27513		113.937	3.29125	2.23022	1.53147										113.953	7.92416	8.01136	7.54071
							112.924	6.375	6.1875	7.389	115.576	5.75466	4.31111	4.22442	115.561	3.82653	1.82617	2.31696		115.589	3.29976	2.24031	1.53981										115.605	7.95324	8.04784	7.57397
							114.54	6.375	6.1875	7.3911	117.228	5.78209	4.30741	4.2904	117.213	3.86784	1.86748	2.33074		117.24	3.29573	2.23697	1.55609										117.256	7.97547	8.0666	7.60069
							116.156	6.375	6.1875	7.3957	118.881	5.80952	4.30371	4.35637	118.866	3.90915	1.90878	2.34451		118.892	3.2917	2.23364	1.57238										118.908	7.9977	8.08536	7.62742
							117.771	6.375	6.1875	7.3967	120.533	5.82644	4.30664	4.40448	120.518	3.95046	1.9438	2.35829		120.544	3.29009	2.23398	1.58773										120.56	8.02495	8.10917	7.65728
							119.387	6.375	6.1875	7.3988	122.185	5.82128	4.32356	4.41471	122.171	3.99177	1.96446	2.37206		122.195	3.29339	2.24181	1.60117										122.211	8.06197	8.14288	7.69329
							121.003	6.375	6.1875	7.3995	123.838	5.81613	4.34048	4.42493	123.823	4.03308	1.98512	2.38584		123.847	3.29669	2.24963	1.61462										123.863	8.099	8.1766	7.72929
							122.619	6.375	6.1875	7.4015	125.49	5.82963	4.35716	4.44082	125.476	4.07439	2.01155	2.39961		125.499	3.30449	2.25768	1.62982										125.514	8.13384	8.20906	7.76437
							124.235	6.375	6.1875	7.4099	127.141	5.8874	4.37329	4.47028	127.128	4.1157	2.05286	2.41338		127.15	3.32265	2.26624	1.64911										127.166	8.16387	8.23873	7.7974
							125.851	6.375	6.1875	7.4134	128.793	5.94517	4.38942	4.49974	128.78	4.15701	2.09416	2.42716		128.802	3.34082	2.27479	1.66841										128.817	8.19389	8.2684	7.83044
							127.467	6.375	6.1875	7.4199	130.444	6.00116	4.40443	4.51941	130.433	4.19832	2.13024	2.44265		130.453	3.35436	2.28503	1.68421										130.469	8.22755	8.29995	7.8632
							129.082	6.375	6.1875	7.421	132.096	6.05233	4.41643	4.51237	132.085	4.23963	2.1509	2.46331		132.105	3.35568	2.29969	1.69082										132.12	8.27039	8.33629	7.89527
							130.698	6.375	6.1875	7.4219	133.747	6.10349	4.42842	4.50534	133.738	4.28094	2.17156	2.48397		133.757	3.35701	2.31436	1.69743										133.771	8.31322	8.37262	7.92735
							132.314	6.375	6.1875	7.422	135.399	6.14703	4.44424	4.50898	135.39	4.32225	2.19221	2.50463		135.408	3.36053	2.32813	1.70664										135.422	8.35462	8.40688	7.9574
							133.93	6.375	6.1875	7.4229	137.052	6.16661	4.47197	4.54612	137.043	4.36357	2.21287	2.5253		137.06	3.37077	2.33916	1.72378										137.074	8.39184	8.4351	7.98158
							135.546	6.375	6.1875	7.4285	138.704	6.18618	4.49969	4.58326	138.695	4.40488	2.23353	2.54596		138.712	3.38101	2.35019	1.74093										138.725	8.42907	8.46332	8.00576
							137.162	6.375	6.1875	7.4351	140.356	6.20702	4.52712	4.62325	140.347	4.45053	2.25419	2.56525		140.363	3.39627	2.35994	1.75705										140.377	8.46415	8.4969	8.03195
							138.778	6.3125	6.1875	7.4368	142.008	6.23242	4.55349	4.6737	141.999	4.51247	2.27485	2.57902		142.015	3.4293	2.36513	1.76957										142.028	8.492	8.54874	8.06488
							140.394	6.375	6.1875	7.4375	143.661	6.25783	4.57986	4.72415	143.651	4.57441	2.29551	2.59279		143.666	3.46232	2.37031	1.78209										143.68	8.51984	8.60057	8.09782
							142.009	6.4375	6	7.4375	145.313	6.28068	4.61064	4.76729	145.303	4.63257	2.31617	2.60657		145.317	3.4944	2.37583	1.79425										145.331	8.54893	8.64927	8.13217
							143.625	6.5	6.0625	7.5625	146.965	6.2926	4.66019	4.77885	146.955	4.67388	2.33683	2.62034		146.969	3.52247	2.38273	1.80492										146.983	8.58295	8.6853	8.17213
							145.241	6.5625	6.125	7.625	148.618	6.30453	4.70974	4.79041	148.608	4.71519	2.35749	2.63412		148.62	3.55055	2.38963	1.81559										148.634	8.61697	8.72133	8.2121
							146.856	6.625	6.1875	7.6875	150.27	6.32188	4.75978	4.81048	150.26	4.7565	2.37814	2.64789		150.272	3.57944	2.39633	1.82776										150.286	8.65133	8.75968	8.26212
							148.472	6.6875	6.25	7.75	151.922	6.36704	4.8123	4.87467	151.913	4.79781	2.3988	2.66167		151.923	3.61246	2.40198	1.84748										151.937	8.68733	8.80921	8.35977
							150.087	6.75	6.375	7.875	153.574	6.4122	4.86481	4.93887	153.565	4.83912	2.41946	2.67544		153.575	3.64549	2.40763	1.8672										153.589	8.72333	8.85875	8.45743
							151.703	6.8125	6.4375	7.875	155.225	6.45674	4.92074	5.00102	155.217	4.88315	2.44012	2.69008		155.226	3.67708	2.41375	1.88739										155.24	8.75847	8.90115	8.54983
							153.318	6.875	6.5	7.9375	156.877	6.49735	4.99831	5.04987	156.869	4.94509	2.46078	2.71074		156.877	3.69957	2.42287	1.91051										156.892	8.78853	8.90082	8.61055
							154.933	6.9375	6.125	7.5625	158.529	6.53795	5.07589	5.09873	158.521	5.00703	2.48144	2.7314		158.529	3.72207	2.43199	1.93363										158.543	8.81859	8.90049	8.67127
							156.549	6.9375	6.0625	7.3125	160.181	6.57911	5.14718	5.14422	160.173	5.06682	2.5014	2.75137		160.181	3.74473	2.44176	1.95682										160.195	8.84706	8.90985	8.73322
							158.163	6.375	6.3125	7.5	161.833	6.6248	5.16575	5.16133	161.825	5.10813	2.51517	2.76515		161.832	3.76881	2.45686	1.98053										161.846	8.86368	8.99307	8.80485
							159.778	6.6875	6.5	7.75	163.485	6.67049	5.18432	5.17845	163.478	5.14944	2.52895	2.77892		163.484	3.79289	2.47195	2.00425										163.498	8.88029	9.07628	8.87648
							161.393	6.875	6.6875	7.875	165.137	6.71737	5.20601	5.19578	165.13	5.19075	2.54272	2.7927		165.135	3.81528	2.48662	2.0294										165.15	8.89891	9.15463	8.94501
							163.008	6.9375	6.75	8	166.788	6.77741	5.26338	5.21558	166.782	5.23206	2.55649	2.80647		166.787	3.81872	2.49653	2.07045										166.801	8.93755	9.18076	8.97973
							164.623	7	6.875	8.125	168.439	6.83745	5.32075	5.23537	168.435	5.27337	2.57027	2.82025		168.438	3.82215	2.50644	2.11149										168.453	8.97619	9.20689	9.01444
							166.238	7.0625	6.875	8.125	170.091	6.89803	5.37702	5.25618	170.087	5.31468	2.58404	2.83402		170.09	3.82595	2.51626	2.1511										170.104	9.01931	9.23637	9.04903
							167.853	7.1875	6.9375	8.25	171.742	6.96777	5.41346	5.29486	171.74	5.35599	2.59781	2.8478		171.742	3.83596	2.52448	2.1657										171.752	9.12894	9.32041	9.0814
							169.467	7.3125	6.9375	8.3125	173.393	7.0375	5.44991	5.33355	173.392	5.39731	2.61159	2.86157		173.393	3.84596	2.5327	2.1803										173.4	9.23858	9.40444	9.11377
							171.082	7.4375	6.9375	8.4375	175.044	7.10624	5.48573	5.37227	175.045	5.43917	2.62608	2.87552		175.045	3.8561	2.54162	2.19482										175.048	9.34693	9.4867	9.1471
							172.697	7.5	7	8.5	176.696	7.13789	5.49852	5.41191	176.696	5.50112	2.66738	2.89618		176.697	3.87067	2.57468	2.20655										176.699	9.41262	9.50513	9.2124
							174.312	7.5625	7	8.5625	178.348	7.16955	5.51131	5.45156	178.348	5.56306	2.70869	2.91684		178.348	3.88523	2.60774	2.21827										178.349	9.47831	9.52357	9.2777
							175.926	7.625	7.0625	8.625	180	7.2012	5.5241	5.4912	180	5.625	2.75	2.9375		180	3.8998	2.6408	2.23										180	9.544	9.542	9.343
							177.541	7.625	7.125	8.6875
							179.156	7.6875	7.125	8.75
							180.771	7.75	7.1875	8.8125
							182.385	7.8125	7.25	8.8125
							184	7.875	7.3125	8.875
[truncated: 32 more columns]
